# Supplementary material
Source: publisher site journal article supplement (https://www.dovepress.com/article/297702)
Supplement: Supplementary file 1 [file get_supplementary_file.php]

**Objective and subjective sleep in rheumatoid arthritis and severe seasonal allergy - the role of sickness, central and peripheral inflammation**

Sandra Tamm, Catarina Lensmar, Anna Andreasson, John Axelsson, Anton Forsberg Morén, Johan Grunewald, Pär Gyllfors, Bianka Karshikoff, Eva Kosek, Jon Lampa, Caroline Olgart Höglund, Viktoria Strand, Simon Cervenka, Mats Lekander

**Supplementary materials**


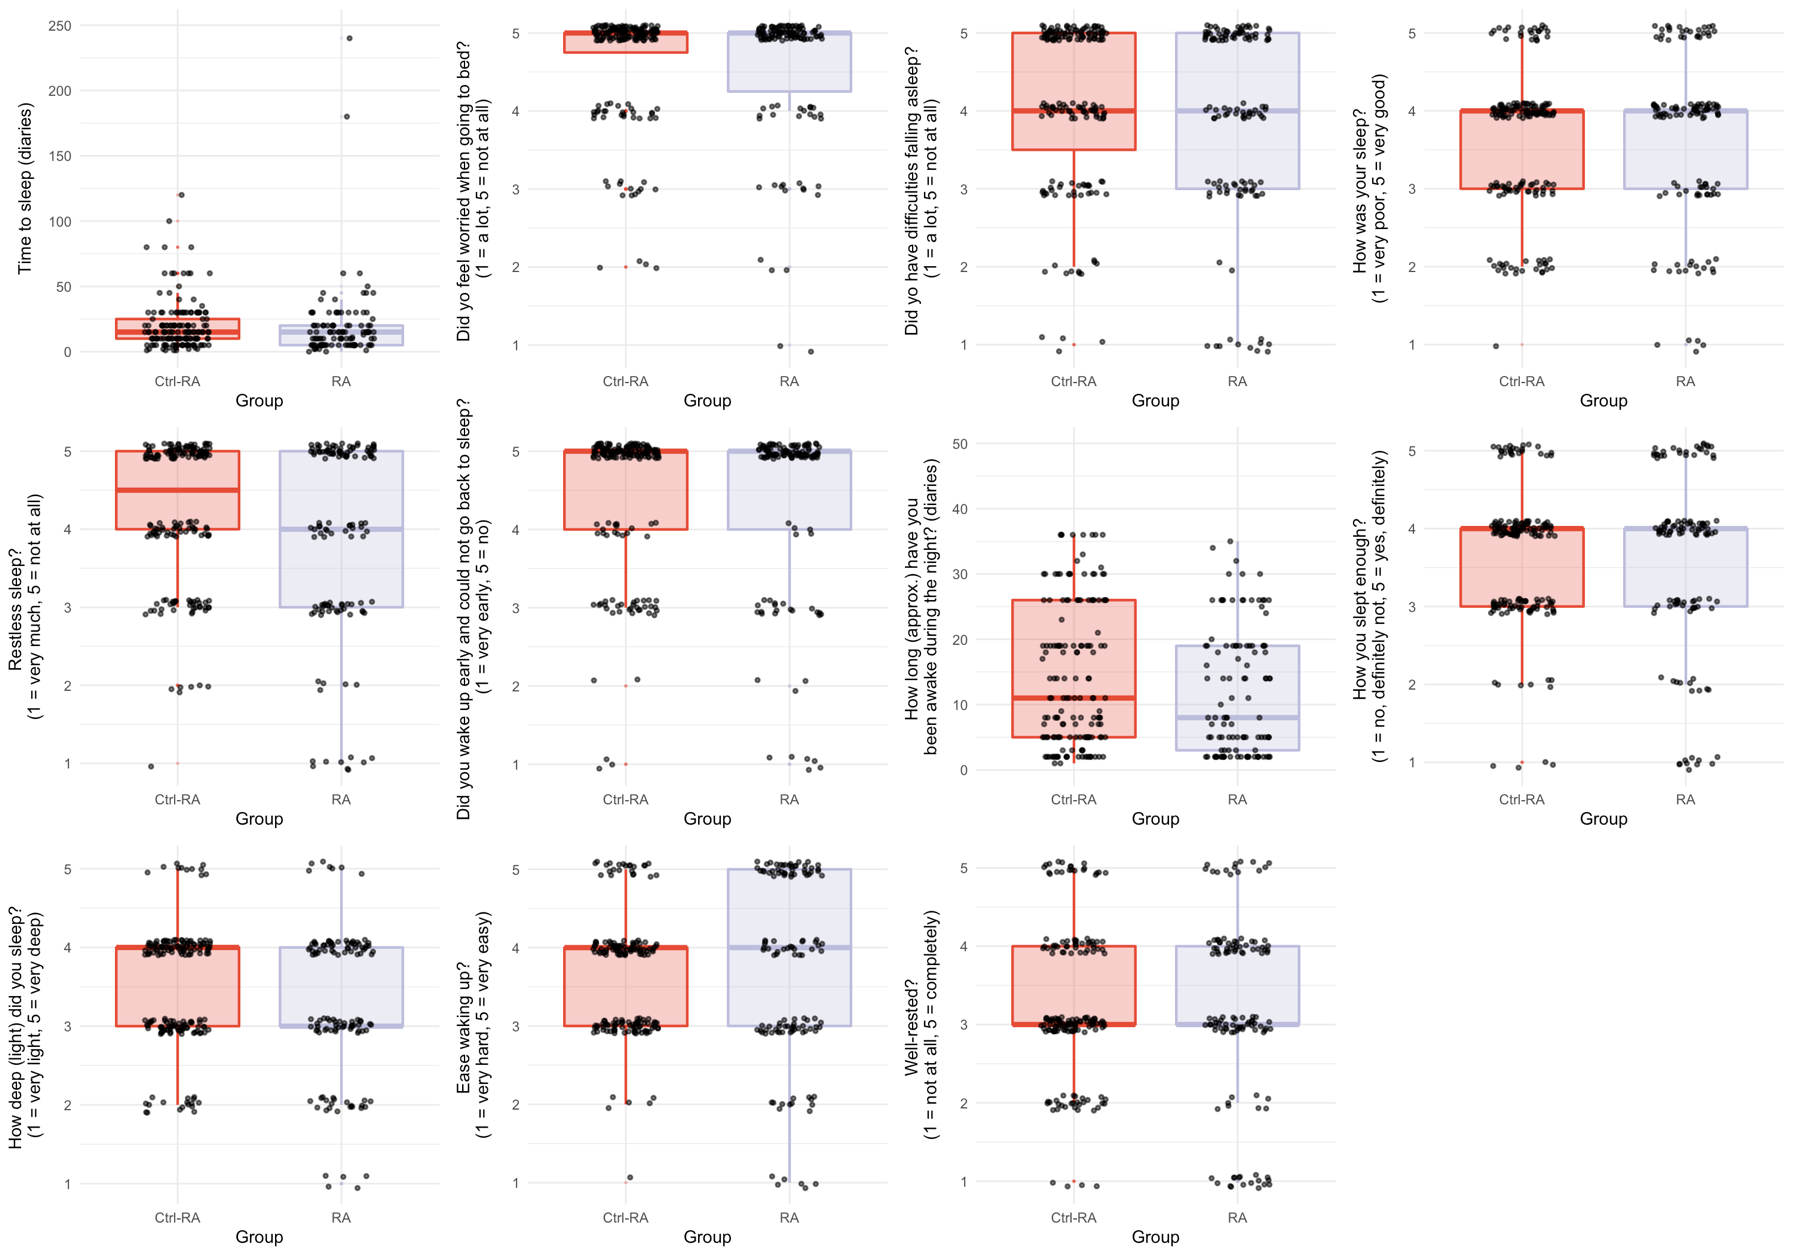


**Supplementary figure 1.** Diary data for visualization (RA).


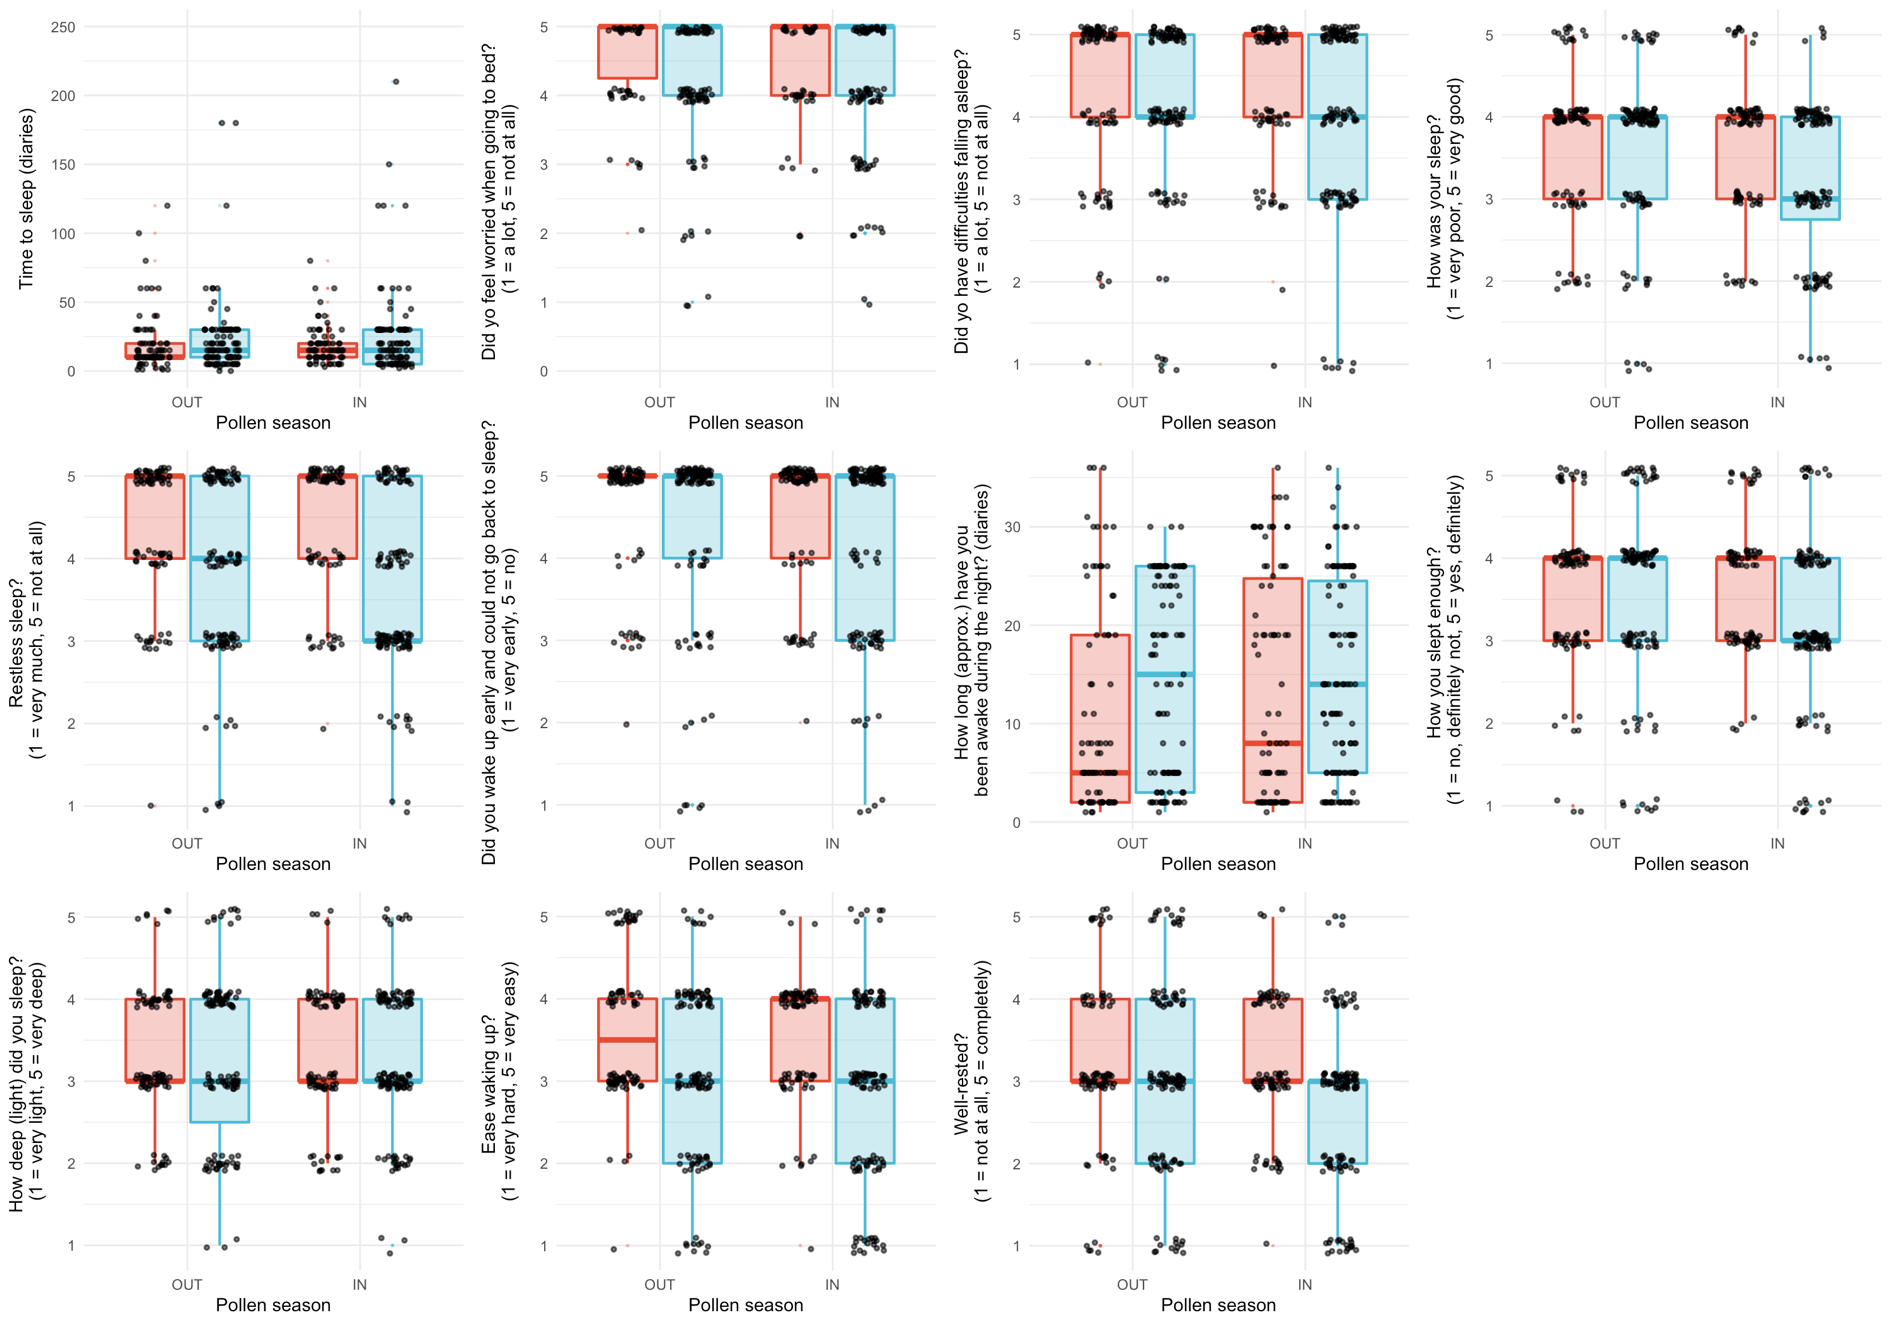


**Supplementary figure 2**. Diary data for visualization (allergy).

**Supplementary table 1.** Possible predictors of sleep variables across allergy patients, RA patients and healthy controls, investigated in a linear mixed effects model which included sex and age as fixed effects.

| Predictor | Intercept | Allergy |  | RA |  | Predictor |  | Allergy*Predictor |  | RA*Predictor |  |
| --- | --- | --- | --- | --- | --- | --- | --- | --- | --- | --- | --- |
|  | Estimate + CI | Estimate + CI | p | Estimate + CI | p | Estimate + CI | p | Estimate + CI | p | Estimate + CI | p |
| **Cytokines** |  |  |  |  |  |  |  |  |  |  |  |
| Deep sleep | 98.88 (73.29-124.47) | -19.65 (-42.14-2.85) | 0.085 | -15.67 (-42.09-10.75) | 0.239 | -8.7 (-21.19-3.79) | 0.171 | 15.45 (-2.11-33) | 0.084 | 1.81 (-15.87-19.49) | 0.837 |
| Total sleep time (EEG) | 435.67 (380.41-490.93) | -17.52 (-83.56-48.53) | 0.596 | -3.05 (-65.22-59.12) | 0.922 | 15.08 (-24.64-54.8) | 0.455 | -11.44 (-72.43-49.56) | 0.712 | -20.71 (-70.31-28.88) | 0.405 |
| Sleep quality | 4.35 (3.77-4.92) | -0.23 (-0.85-0.38) | 0.449 | 0.12 (-0.49-0.73) | 0.689 | 0.01 (-0.4-0.42) | 0.958 | -0.05 (-0.6-0.5) | 0.85 | -0.17 (-0.64-0.3) | 0.465 |
| **PBR-28 binding** |  |  |  |  |  |  |  |  |  |  |  |
| Deep sleep | 87.23 (56.87-117.58) | -9.05 (-35.34-17.25) | 0.491 | -7.15 (-42.08-27.77) | 0.681 | 2.64 (-1.07-6.34) | 0.163 | 1.71 (-4.99-8.41) | 0.616 | -2.32 (-11.68-7.05) | 0.62 |
| Total sleep time (EEG) | 489.4 (428.19-550.61) | -44.02 (-113.68-25.64) | 0.209 | -29.07 (-100.42-42.29) | 0.415 | -4.88 (-15.89-6.12) | 0.383 | 1.36 (-19.22-21.94) | 0.897 | 1.84 (-17.65-21.33) | 0.85 |
| Sleep quality | 4.54 (3.89-5.19) | -0.34 (-1.02-0.33) | 0.312 | -0.23 (-0.94-0.48) | 0.517 | -0.04 (-0.15-0.06) | 0.405 | 0.02 (-0.17-0.21) | 0.84 | 0.04 (-0.16-0.23) | 0.705 |
| **Sickness** |  |  |  |  |  |  |  |  |  |  |  |
| Deep sleep | 93.19 (68.18-118.2) | -11.15 (-28.06-5.76) | 0.191 | -26.06 (-47.81--4.3) | 0.02 | -1.39 (-3.1-0.32) | 0.11 | 1.87 (-0.15-3.88) | 0.069 | 2.21 (-0.74-5.16) | 0.138 |
| Total sleep time (EEG) | 454.08 (406.88-501.28) | -48.32 (-85.6--11.05) | 0.012 | -25.19 (-67.51-17.13) | 0.237 | -1.29 (-6.26-3.68) | 0.61 | 4.42 (-1.81-10.66) | 0.164 | 1.09 (-5.82-8) | 0.752 |
| Sleep quality | 4.35 (3.94-4.75) | -0.21 (-0.51-0.1) | 0.177 | 0.36 (0-0.72) | 0.051 | 0.03 (-0.02-0.07) | 0.195 | -0.03 (-0.09-0.02) | 0.194 | -0.12 (-0.18--0.06) | 0 |


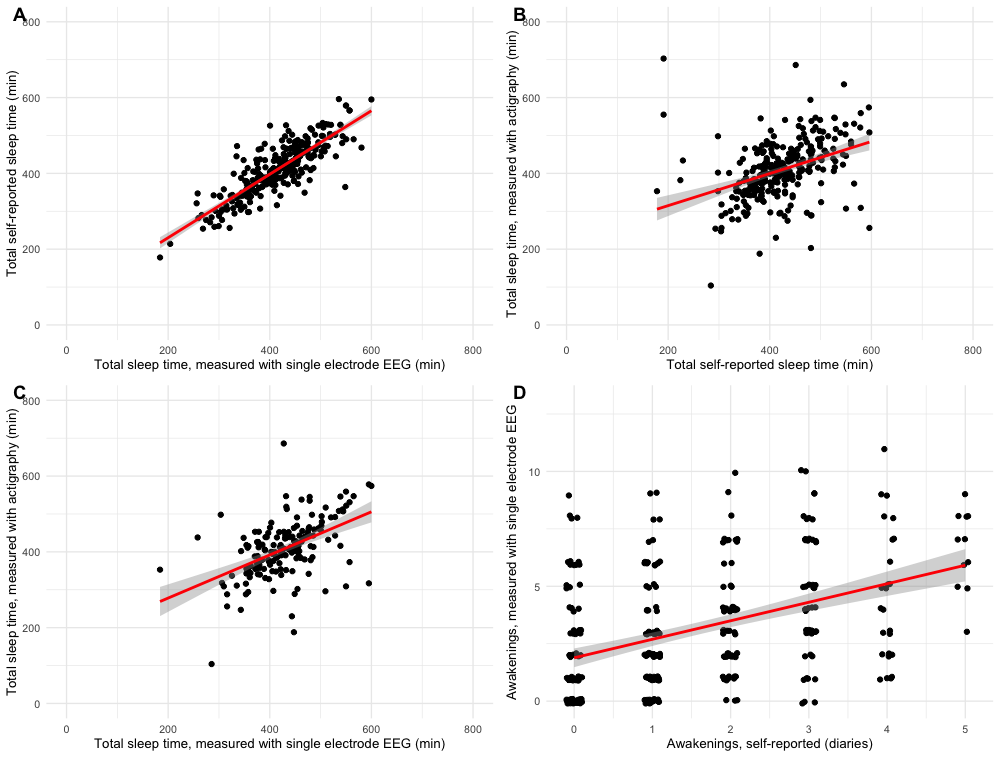


**Supplementary figure 3**. Associations between different sleep measures. Results reported as effect estimates from mixed effects models with 95 % confidence intervals. **A**. Association between sleep diaries and single EEG electrode for TST (0.81 CI[0.75, 0.87], p < 0.001). 300 observations from 51 individuals. **B**. Association between actigraphy and sleep diaries for TST (0.42 CI[0.29, 0.54], p < 0.001). 280 observations from 38 individuals. **C.** Association between actigraphy and single EEG for TST (0.52 CI[0.37, 0.68], p < 0.001). 164 observations from 30 individuals. **D.** Association between number of awakenings measured with single electrode EEG and sleep diaries (0.55 CI[0.36, 0.73], p < 0.001), jittered for visualization. 320 observations from 51 subjects.
